# Supplementary material
Source: PubMed Central journal article supplement (PMC3744895)

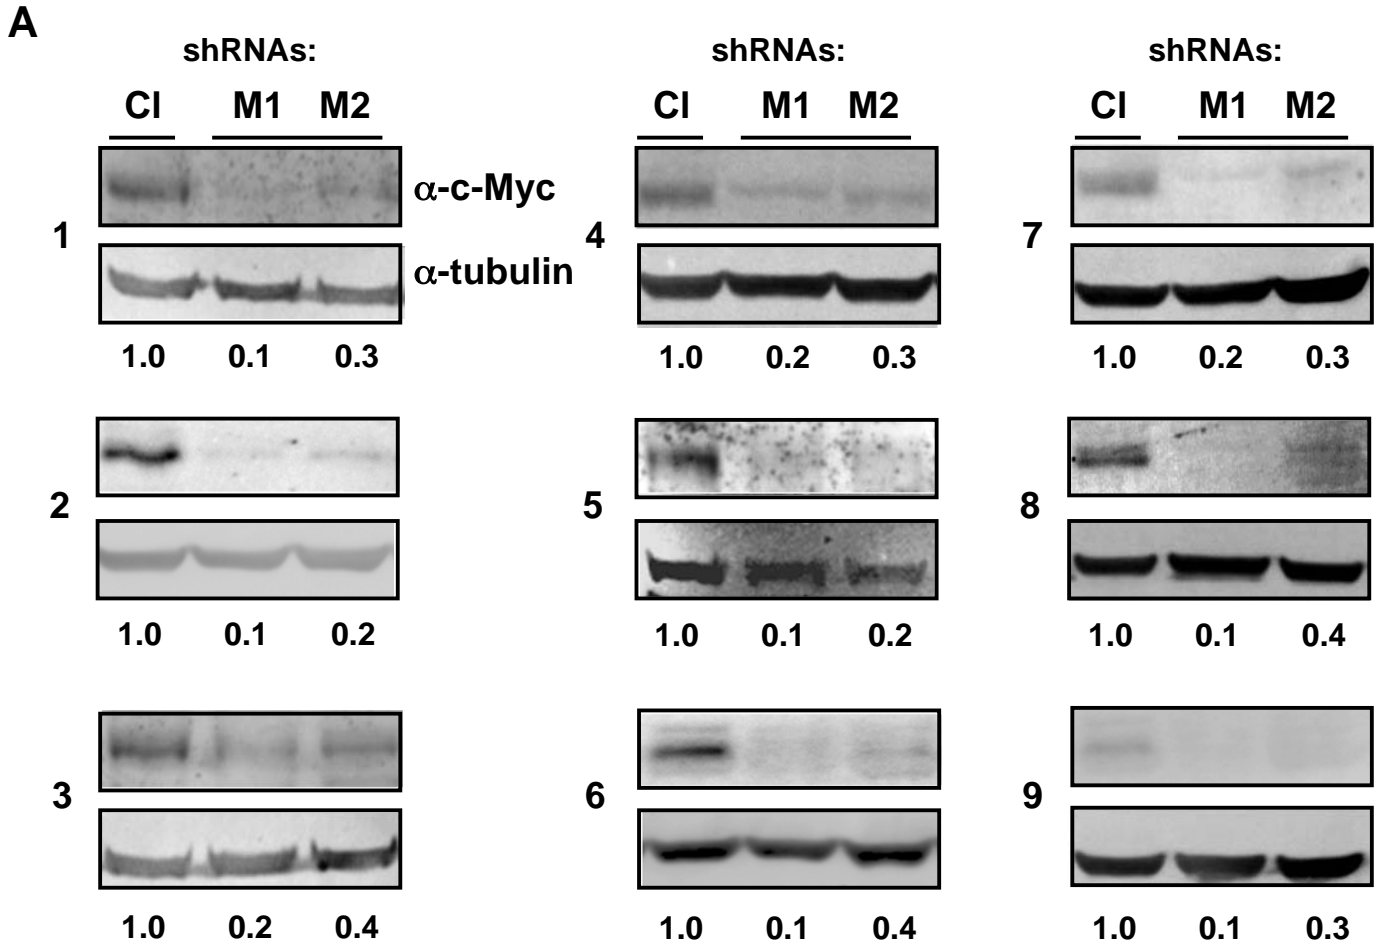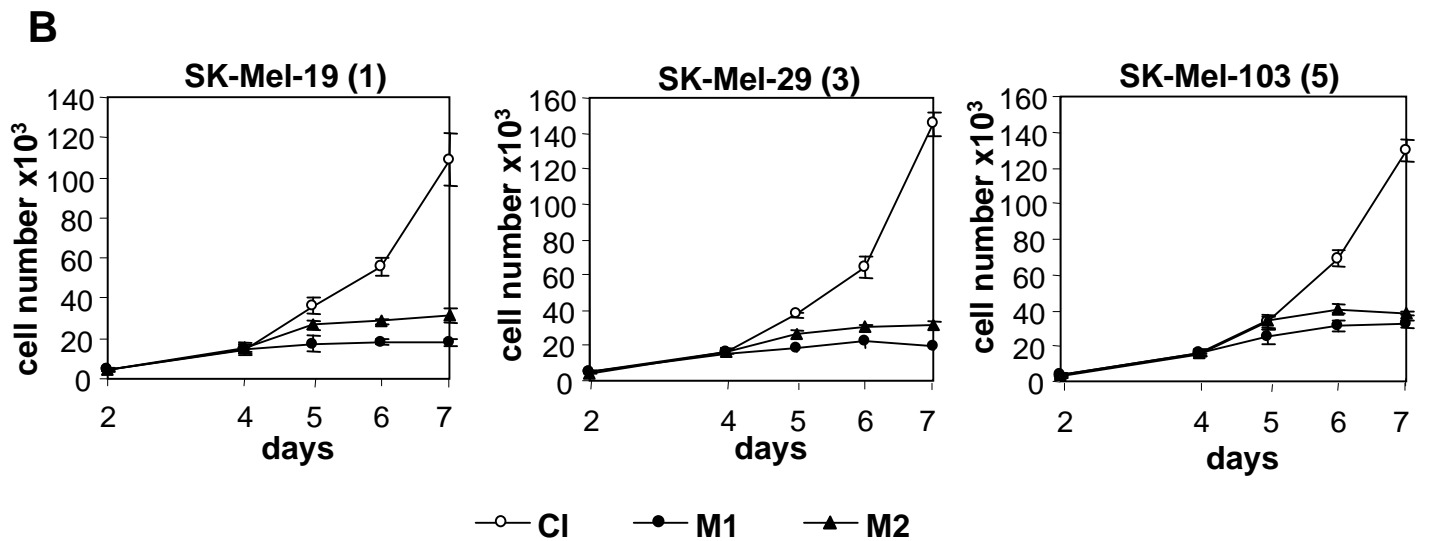

## SK-Mel-19

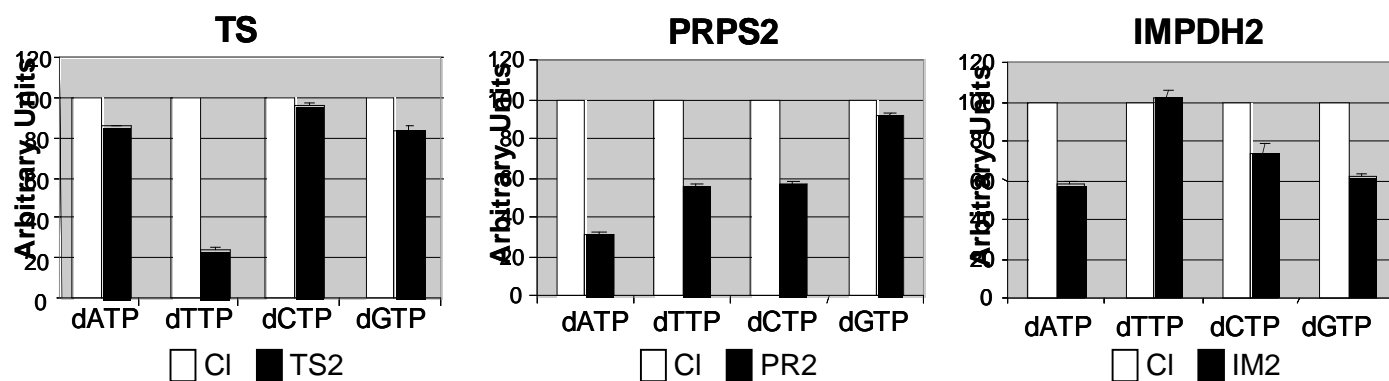

Suppl. Fig. 2

A

## SK-Mel-29

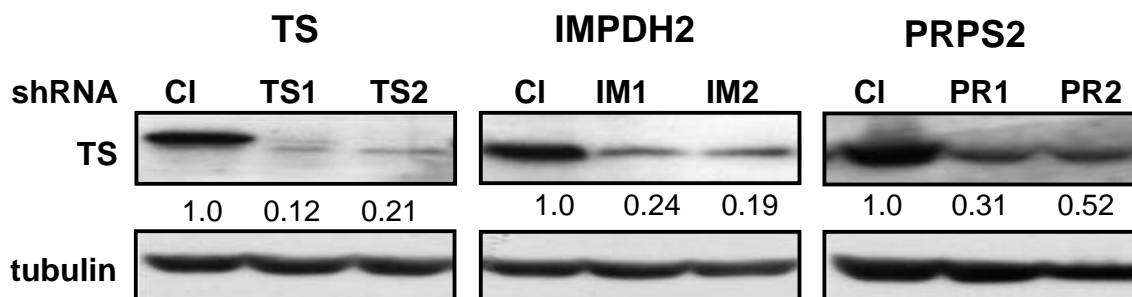

B

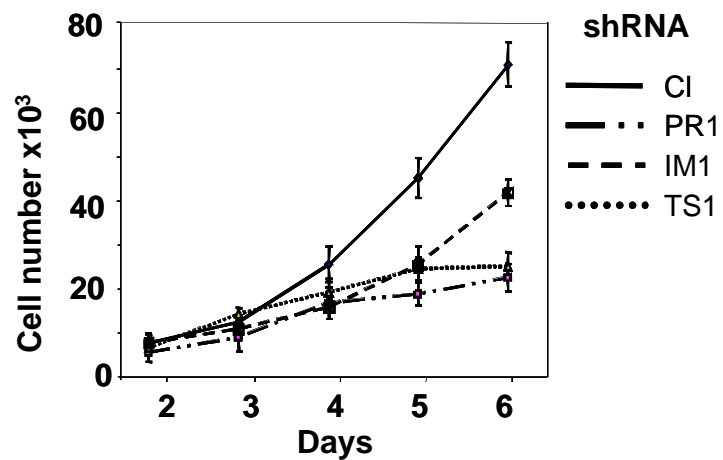

C

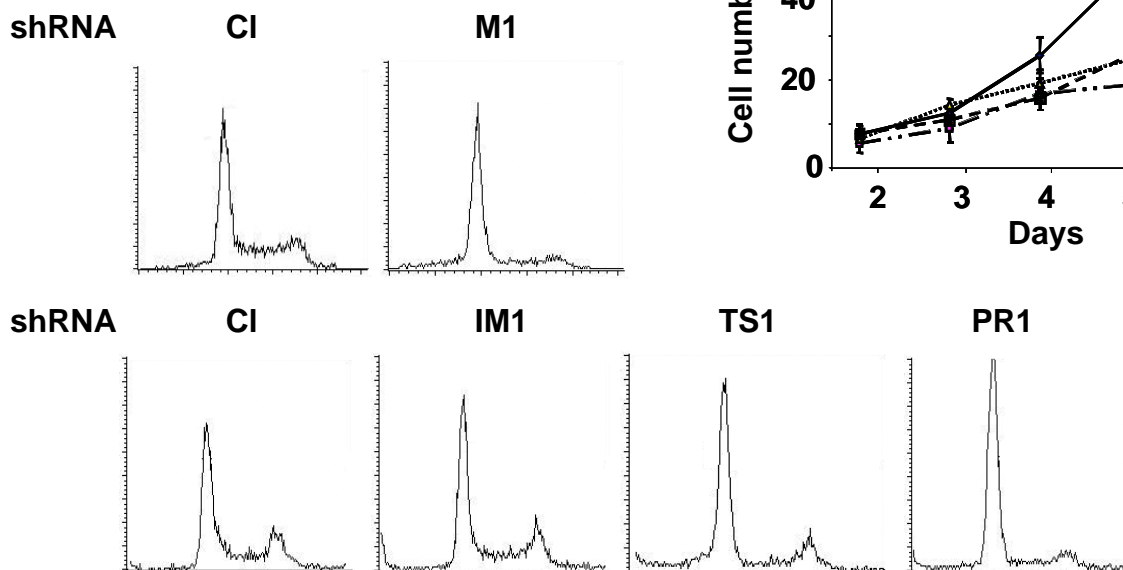

Suppl. Fig. 3

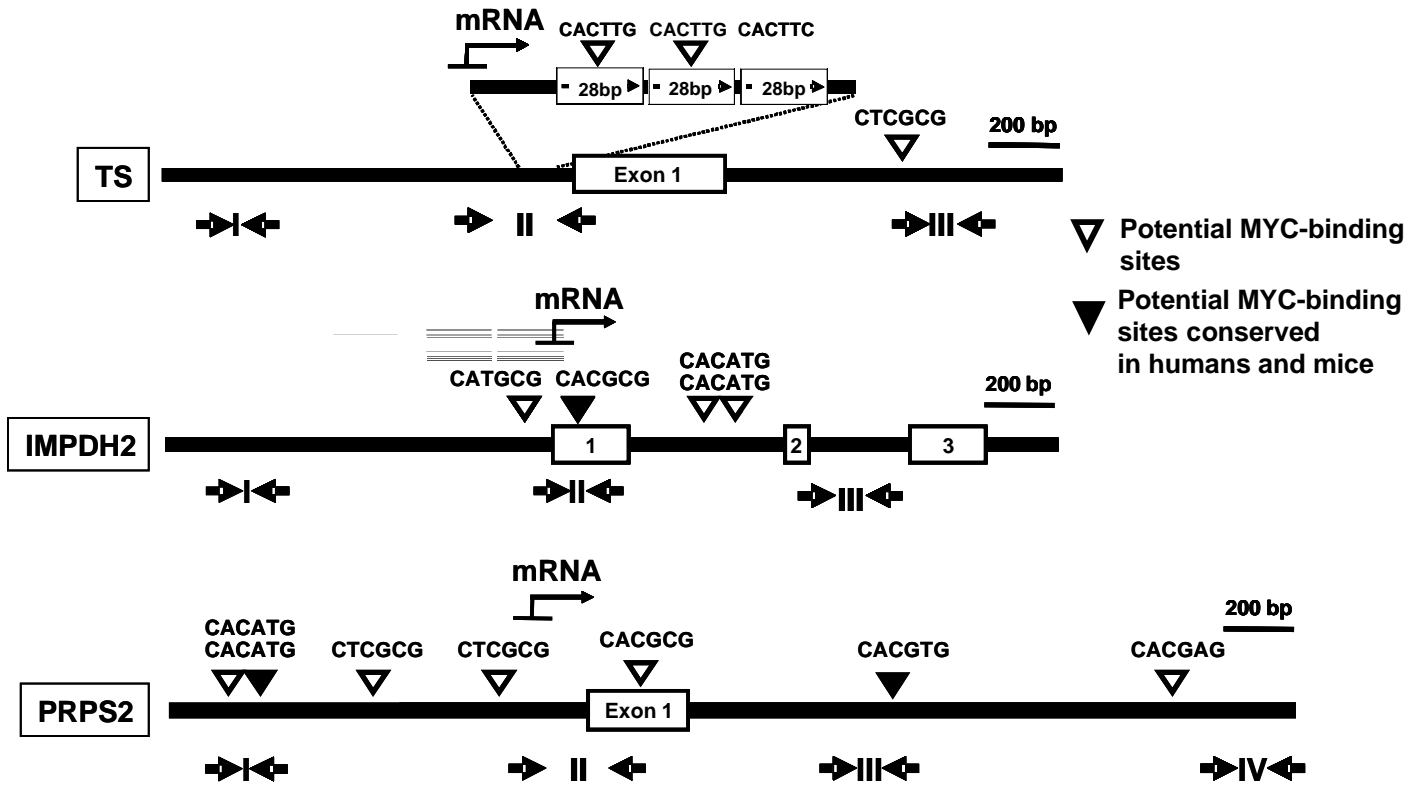

Suppl. Fig. 4

# SK-Mel-29

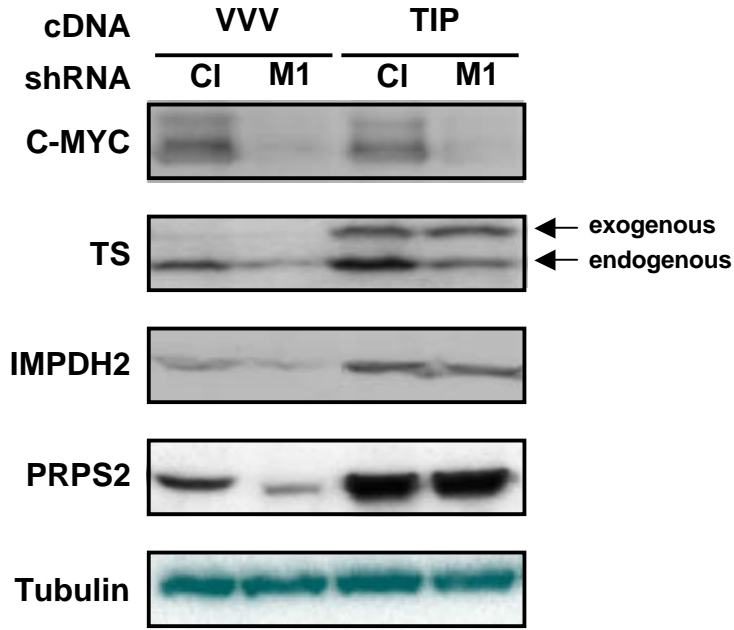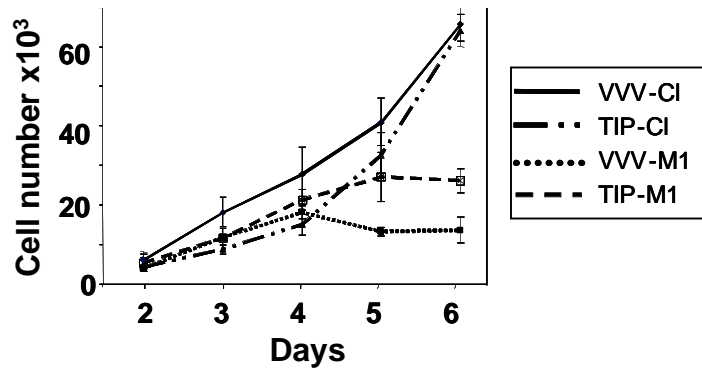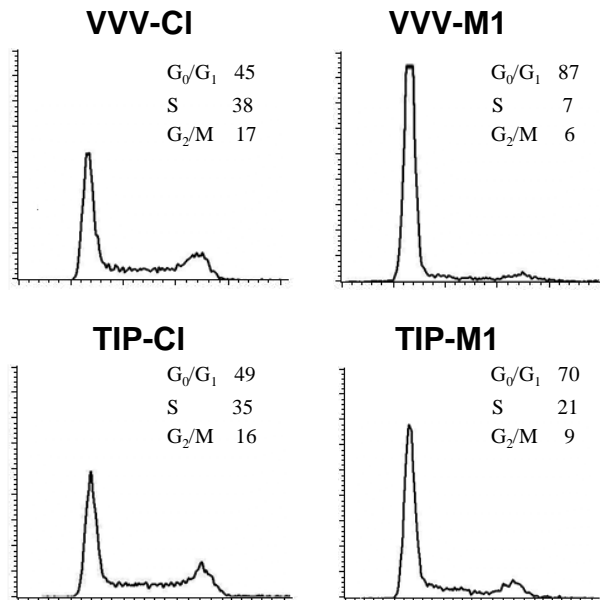

Suppl. Fig. 5

Supplement: NIHMS486377-supplement-Supplement1.pdf [file NIHMS486377-supplement-Supplement1.pdf]
